# Supplementary material
Source: PubMed Central journal article supplement (PMC7834511)
Supplement: mmc1.pdf [file mmc1.pdf]

# Wiley Editing Services

## ENGLISH EDITING CERTIFICATE

This document certifies that the manuscript listed below was edited for proper English language, grammar, punctuation, spelling, and overall style by one or more of the highly qualified native English speaking editors at Wiley Editing Services

### Manuscript title

The effect of Emotional Freedom Technique (EFT) on nurses' stress, anxiety, and burnout levels during the COVID-19 pandemic: A randomized controlled study

### Authors

Berna Dinçer, Demet İnangil

### Order No

DEGIL\_1

### Date Issued

July 30, 2020

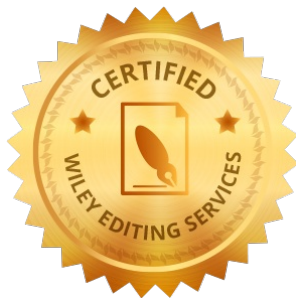

This document certifies that the manuscript listed above was edited for proper English language, grammar, punctuation, spelling, and overall style. Neither the research content nor the authors' intentions were altered in any way during the editing process. Documents receiving this certification should be English-ready for publication; however, the author has the ability to accept or reject our suggestions and changes. If you have any questions or concerns about this document or certification, please contact [help@wileyeditingservices.com](mailto:help@wileyeditingservices.com).

Wiley Publishing Services is a service of Wiley Publishing. Wiley's Scientific, Technical, Medical, and Scholarly (STMS) business serves the world's research and scholarly communities, and is the largest publisher for professional and scholarly societies. Wiley is committed to providing high quality services for researchers. To find out more about Wiley Editing Services, visit <http://wileyeditingservices.com>. To learn more about our other author services provided by Wiley Publishing, visit <https://authorservices.wiley.com/>

WILEY
